## 24 Summary

25

26 **Globally, weedy plants result in more crop yield loss than plant pathogens and insect pests**  
27 **combined. Much of the success of weeds rests with their ability to rapidly adapt in the face**  
28 **of human-mediated environmental management and change. The evolution of resistance to**  
29 **herbicides is an emblematic example of this rapid adaptation. Here, we focus on *Alopecurus***  
30 ***myosuroides* (blackgrass), the most impactful agricultural weed in Europe. To gain insights**  
31 **into the evolutionary history and genomic mechanisms underlying adaptation in**  
32 **blackgrass, we assembled and annotated its large, complex genome. We show that non-**  
33 **target site herbicide resistance is oligogenic and likely evolves from standing genetic**  
34 **variation. We present evidence for divergent selection of resistance at the level of the**  
35 **genome in wild, evolved populations, though at the transcriptional level, resistance**  
36 **mechanisms are underpinned by similar patterns of up-regulation of stress- and defence-**  
37 **responsive gene families. These gene families are expanded in the blackgrass genome,**  
38 **suggesting that the large, duplicated, and dynamic genome plays a role in enabling rapid**  
39 **adaptation in blackgrass. These observations have wide significance for understanding**  
40 **rapid plant adaptation in novel stressful environments.**

41

## 42 Main

43 Human-mediated environmental change is driving rapid evolutionary responses in the  
44 global biota <sup>1,2</sup> and it is important to understand the outcome of these changes in natural and  
45 agricultural plant populations and communities. Plant genomes offer glimpses into the adaptive  
46 potential of plant populations when challenged with novel environmental stresses. Agricultural  
47 weeds rapidly adapt in managed agroecosystems and have been proposed as models to address  
48 fundamental questions in plant ecology and evolution <sup>3-7</sup>. Their global impacts on crop yields  
49 provides an additional economic incentive to understand weed adaptation.

50 Herbicide use has become a mainstay of weed management in most industrialized  
51 agricultural economies. Unsurprisingly, heavy reliance on herbicides has resulted in the rapid  
52 and widespread evolution of resistance, making herbicide resistance a widely studied weedy trait  
53 <sup>8-9</sup>. Two main ‘types’ of herbicide resistance are recognized <sup>10-11</sup>. Target site resistance (TSR)  
54 refers to modification of the sequence, copy number or expression of the gene encoding the

55 herbicide target enzyme. Non-target site resistance (NTSR) encompasses a range of mechanisms  
56 that limit herbicide delivery to its site of action. Typically, NTSR is inherited in a quantitative  
57 manner, and despite some advances in identifying and/or validating causal loci <sup>12-15</sup>, efforts to  
58 discern the genomic basis and evolutionary dynamics of this trait have been hampered by lack of  
59 access to genomic resources in target species.

60 The diploid, allogamous grass, *Alopecurus myosuroides* (blackgrass) is native to the  
61 Eastern Mediterranean and West Asia <sup>16</sup>. It is now a widespread and impactful weed in  
62 agricultural crops in the UK <sup>17</sup>, France <sup>18</sup> and Germany <sup>19</sup>, with evidence of an ongoing range  
63 expansion in Europe. *Alopecurus* species are also major weeds in China <sup>20</sup>. Blackgrass  
64 populations appear to be uniquely prone to the rapid and widespread evolution of herbicide  
65 resistance. In a nationwide survey in England conducted, most blackgrass populations exhibited  
66 resistance to multiple herbicide modes of action <sup>21</sup>. Resistance was conferred by both TSR and  
67 NTSR mechanisms that often co-existed in populations, and there was evidence that current and  
68 historical herbicide use regimes favoured the evolution of the generalist NTSR mechanism <sup>22</sup>.  
69 Herbicide resistant blackgrass is estimated to cost UK farmers £0.4 billion per year <sup>23</sup>.

70 Access to genomes and genomic resources for weed species will greatly enhance the  
71 capacity to unravel pattern and process in economically and ecologically important weedy plant  
72 species <sup>24</sup>. Here, we present a high-quality reference genome of blackgrass. We analyse genome  
73 structure and function to infer genomic features that may predispose blackgrass to the rapid  
74 evolution of weediness and present data from genomic and transcriptomic resequencing of two  
75 well-characterised NTSR populations.

76

## 77 **Results**

78 **Genome assembly and annotation.** Genome analysis indicated that blackgrass (*A. myosuroides*)  
79 has a large genome (3.31-3.55 Gb) and exhibits heterozygosity of 1.52% and repeat content of  
80 84.2% contributing to the large genome size (Supplementary Tables 1 and 2). We adopted a  
81 hierarchical sequencing approach that includes complementary single-molecule  
82 sequencing/mapping technologies coupled with deep coverage short read sequences to generate a  
83 pseudo-chromosome reference genome assembly for blackgrass (Supplementary Figure 1). The  
84 total primary contig length is 3,475 Mb, which is consistent with our genome size estimations  
85 based on flow cytometry and k-mer analysis (3,312-3,423 Mb and 3,400-3,550 Mb,

86 respectively). The final polished blackgrass genome assembly size was highly contiguous at  
87 3,572 Mb, including 3,400 (95.2%) Mb ordered as seven pseudo-chromosomes with only 172  
88 Mb of unanchored sequences (Table 1, Supplementary Table 3).

89 Both the euchromatic and heterochromatic components of the blackgrass genome are  
90 highly complete as supported by BUSCO scores (96.9% from the *Embryophyta* lineage)<sup>25</sup> and a  
91 high long terminal repeat assembly index across the genome (LAI - 9.6-35.2)<sup>26</sup>, with a mean  
92 value of 21.9 (Supplementary Table 4; Supplementary Figure 4). In addition, the Illumina short  
93 reads (81×) returned a 99.6% mapping rate and covered 99.9% of the assembled genome. We  
94 identified 8,026,403 polymorphisms as SNPs or InDels (Figure 1a), which was expected from  
95 the predicted heterozygosity level of the blackgrass genome. We also observed a high correlation  
96 ( $r = 0.98$ ) between the assembled chromosome and cytogenetic chromosome lengths based on  
97 published data<sup>27</sup>.

98 We annotated 45,263 protein-coding genes based on *de novo* and homology-based  
99 predictions and transcriptome data from multiple tissues (Supplementary Figure 3). Mean gene  
100 length was 2,864 bp, with an uneven distribution across the chromosomes with increased gene  
101 density toward the distal ends that recedes to very low density in the middles of chromosomes  
102 (Figure 1a). Among these protein-coding genes, 2,385 were annotated as transcription factors. In  
103 addition, 4,258 non-coding RNAs were identified, including 1,369 transfer RNAs, 941 ribosomal  
104 RNAs, 513 micro RNAs and 1,425 small nuclear RNAs (Figure 1a for genome overview).

105

106 **Transposon elements and the burst of LTR retrotransposons.** We annotated 2,851 Mb  
107 (81.7%) of sequence in the assembled genome as transposable elements (TEs) (Supplementary  
108 Table 5). A total of 5,287,231 repeat elements were identified and the dominant type of TE was  
109 long terminal repeat retrotransposons (LTR-RTs), representing approximately 80.3% (2290 Mb)  
110 of annotated TEs and amounting to 65.6% of the blackgrass genome size. *Gypsy*, *Copia* and  
111 unclassified retrotransposon elements contributed to 39.2%, 8.6% and 17.9% of the genome size,  
112 respectively. DNA transposons contributed to 14.5% of the genome and the CACTA transposon  
113 were the most abundant DNA transposons, accounting for 5.9% of the annotated TEs and 4.9%  
114 of the assembled blackgrass genome (Figure 1b).

115

116 Retrotransposons are highly unstable and have played an important role in the evolution  
117 of plant genomes<sup>28</sup>. We observed a single peak of insertion time, occurring approximately 0.1  
118 million years ago (Ma), for *Gypsy*, *Copia*, and unclassified retrotransposons in blackgrass, which  
119 suggests a recent burst of LTR retrotransposons in the genome (Figure 1c). In addition, we  
120 observed a higher proportion of recent LTR-RT insertions when compared to those in rice,  
121 barley and goatgrass (progenitor of the wheat D genome). Moreover, the burst of  
122 retrotransposons in blackgrass was more recent than those in barley (*Hordeum vulgare*) and  
123 goatgrass (*Aegilops tauschii*) but occurred at a similar time in blackgrass (*A. myosuroides*) and  
124 rice (*Oryza sativa*) (Figure 1d). Therefore, the recent large-scale burst of retrotransposons might  
125 have contributed to blackgrass genome expansion, explaining the large genome size.

126  
127 **Phylogenetics and gene expansion and contraction.** To assess the divergence time between  
128 blackgrass and other grasses, we constructed a phylogenetic tree based on the concatenated  
129 sequence alignment of the 476 single-copy orthologous genes shared by blackgrass and 11 other  
130 species (Figure 2a). The divergence between blackgrass and barley was after the separation of  
131 blackgrass from rice and *Brachypodium distachyon*. The divergence time between blackgrass  
132 and barley was estimated at 37.9 million years ago.

133 We also examined gene family evolution through expansion and contraction events. A  
134 total of 33,757 orthologous gene families composed of 382,550 genes were identified from 12  
135 species, of which 6,470 gene families were shared by all the species. Blackgrass contains 1,678  
136 species-specific gene families, which is the most among all the investigated species  
137 (Supplementary Figure 4). A total of 559 and 352 gene families were identified with significant  
138 expansion and contraction, respectively. GO enrichment analysis of the expanded genes revealed  
139 that they were mainly related to multiple enzymatic functions, including glutathione transferase  
140 (GST), UDP-glycosyltransferase (UGT), and monooxygenases, all of which have been reported  
141 to be associated with non-target site herbicide resistance (Figure 2b).

142  
143 **Genome duplication and comparative genomics.** We explored evidence for whole genome  
144 duplication events in the blackgrass genome. Synonymous substitution rate ( $K_s$ ) values were  
145 calculated from 1,884 paralogous gene pairs and were used to infer the age distribution of the  
146 duplication events, which are evident with two distinct peaks at  $K_s$  values of 0.1 and 0.8,

147 respectively (Figure 2c). To determine if these peaks were species-specific or common in the  
148 grass family, we performed the same analysis for rice, barley, *Brachypodium* and goatgrass  
149 (Figure 2c). The results indicated that the peak at 0.8 was shared in all investigated species,  
150 suggesting blackgrass underwent the same ancient whole genome duplication in the ancestor of  
151 *Poaceae* species ~70 MYA<sup>29</sup>. The peak at 0.1 is not apparent in other species, suggesting that  
152 this genome duplication event is unique for blackgrass. We further examined the paralogous  
153 genes within the duplication events and found that the peak at 0.1 was evidenced by a high  
154 density of 'co-located' paralogous genes on chromosomes 1, 2, and 3 (Figure 1a) which suggests  
155 the blackgrass genome underwent some small-scale local duplication events in addition to the  
156 whole genome duplication. To investigate gene duplication structure in the blackgrass genome,  
157 we analysed all chromosome-anchored protein-coding genes for duplications and organization.  
158 The results show that blackgrass contains 9,106 singletons, 20,856 dispersed duplicated genes,  
159 4,607 proximally duplicated genes, 4,967 tandemly duplicated genes and 3,615 segmentally  
160 duplicated genes.

161 Conserved genome structure and organization between blackgrass, barley, goatgrass,  
162 *Brachypodium*, and rice was examined through collinearity and macro-/micro- synteny  
163 approaches. We identified 11,826 plant gene families shared by all five species with 2,338  
164 blackgrass-specific gene families (Figure 2d). Blackgrass chromosomes 2, 3, 4, 5 and 7 are  
165 completely collinear with barley chromosomes 3, 2, 6, 1, and 5, respectively (Figure 2e). For  
166 blackgrass chromosome 1, most regions were colinear with barley chromosome 7, with two  
167 small regions being colinear with parts of barley chromosome 4 and 5. Blackgrass chromosome  
168 6 was colinear with barley chromosome 4 and a small part of chromosome 1 indicating that  
169 blackgrass genome content and structure most closely resembles that of barley. We observed a  
170 similar pattern of collinearity between blackgrass and goatgrass as we did between blackgrass  
171 and barley (Figure 2e). To investigate the chromosome evolution of blackgrass, we used rice as  
172 the reference species for comparison because it has retained 12 ancestral grass karyotype  
173 chromosomes. We found that blackgrass chromosomes 2 and 4 were derived from single ancient  
174 chromosomes 1 and 2, respectively (Figure 2f). All other blackgrass chromosomes were derived  
175 from fusion events between ancient chromosomes, including the large blackgrass chromosome 1  
176 derived from fusion events among ancient chromosomes 3, 6, 8, 11 and 12; 3 from 4 and 7; 5  
177 from 5 and 10, 6 from 3, 6 and 8; 7 from 9, 11 and 12. These chromosome reshuffling events

178 might have contributed to the introduction of genetic variation and speciation of blackgrass.  
179 Combined, these results indicate that blackgrass diverged from *Brachypodium* and rice earlier  
180 than barely and goatgrass.

181  
182 **QTL-seq bulk segregant analysis for NTSR.** To identify the genomic regions controlling  
183 herbicide resistance, we performed bulk segregant analysis in the CC2 and CC5 families to  
184 identify  $\Delta$ SNP values with trait significance<sup>30,31</sup>. We obtained 3,402,057 and 3,205,888 reliable  
185 SNPs for each of the CC2 and CC5 families, respectively (Supplementary Figure 5). We  
186 identified 7 significant QTLs in the CC2 family distributed among chromosomes 2,3,5, and 6  
187 (Supplementary Table 6). In the CC5 family we identified 8 QTLs distributed mainly on  
188 chromosome 3 with 1 region on chromosome 2 (Supplementary Table 6). Interestingly, there  
189 was no overlap between QTL regions identified in the two seed families, however 12 of the 15  
190 total QTL regions were located on chromosomes 2 and 3 (Figure 3). These two chromosomes  
191 also showed the greatest density of differentially expressed genes (DEGs), with almost half (33)  
192 of the 68 consistent DEGs located on these two chromosomes, along with half of the previously  
193 reported NTSR candidate loci for this species (Figure 3). These results suggest that  
194 chromosomes 2 and 3 are ‘hot-spots’ for NTSR evolution in this species. In addition, a total of  
195 371 genes were encoded within the 15 identified QTLs, with each QTL containing between 10  
196 and 58 genes. Among the 15 identified QTL regions, seven contain differentially expressed  
197 genes identified between susceptible and resistant plants; six of them contain transcription  
198 factors. The most significant QTL was identified on chromosome 2 in the CC2 family, which  
199 covered 2.5 Mb and contains 33 candidate genes. An NADPH-dependent aldo-keto reductase  
200 gene was present in this region and was upregulated in resistant plants for both CC2 and CC5  
201 families. Members of this gene family have been reported to be associated with non-target  
202 herbicide resistance in other weed species<sup>32</sup>.

203  
204 **RNA-seq analysis of herbicide resistance.** To identify differentially expressed genes between  
205 susceptible and resistant plants, we performed RNA-seq analysis in two seed families (CC2 and  
206 CC5). Principal components analysis of gene expression data (19,937 genes across 19 biological  
207 samples) indicates both seed families and resistance phenotypes contain significant sources of  
208 variation between samples (Figure 4a). Seed family (CC2 vs. CC5) was the stronger source of

209 variance accounting for ~58% of the total variance on the first Principal Component (PC1).  
210 Within each seed family, the herbicide resistant ‘R’ samples form separate clusters from their  
211 susceptible ‘S’ counterparts on PC2. The PC2 axis represents 12% of the total variance. In each  
212 seed family the ‘direction’ of separation of ‘R’ samples from ‘S’ is the same.

213 Differential expression analysis between ‘R’ and ‘S’ samples across the two seed families  
214 identified 643 differentially expressed genes. Of these, 341 were unique to family ‘CC2’, while  
215 234 were unique to family ‘CC5’ (Figure 4b). A subset of 68 genes were found to be  
216 differentially expressed in both seed families. Hierarchical clustering of these 68 genes  
217 confirmed that resistance phenotype was a greater source of variability than seed family, and  
218 81% (55) of these 68 genes were up-regulated in ‘R’ samples relative to ‘S’ for both families  
219 (Figure 4c).

220 The list of 68 DEGs consistent across both seed families was found to contain three of  
221 eight previously recorded blackgrass NTSR candidate genes; ‘*AmGSTF1*’, ‘*AmGSTU2*’, and  
222 ‘*AmOPRI*’<sup>15,16</sup>. In each case, expression of these three candidate genes was significantly higher  
223 in the ‘R’ phenotype than the ‘S’ (Supplementary Figure 6), agreeing with previously reported  
224 findings<sup>15,16</sup>. Across the 68 consistent DEGs, six glutathione-S-transferases (GST), six  
225 cytochrome P450s, three ATP-binding cassette transporters (ABC transporters), and one aldo-  
226 keto reductase were found. This is consistent with a previous study which has demonstrated the  
227 potential importance of these key gene families in herbicide metabolism<sup>11</sup>. Gene set enrichment  
228 analysis of DEGs for each family identified both shared and unique GO terms. Most of the  
229 shared overrepresented GO terms have been reported to be associated with NTSR, including  
230 glutathione transferase, UDP-glycosyltransferase, and some cytochrome P450 superfamilies.  
231 Xenobiotic transmembrane transporter was only overrepresented in CC5 (Figure 4d and 4e),  
232 indicating possible family-specific mechanism of resistance for CC5.

233

### 234 **Genetic coordination of NTSR via gene co-expression network analysis**

235 Gene co-expression networks were constructed using traditional spearman-ranked and condition  
236 specific approaches that enable alternate strategies to examine the genetic coordination of NTSR  
237 mechanisms (Figure 5a and 5b, respectively). The traditional spearman ranked coefficient  
238 approaches resulted in a total of 16,601 nodes connected by 16,130 edges (Figure 5a). Hub gene  
239 sub-graphs display significant co-expressed gene interaction pairs that include candidate genes



240 from the bulk segregant and RNA-seq studies. We identified a total of 13 CC2 specific sub-  
241 graphs and 20 for CC5 (Supplemental Figure 7a-d). In CC2, we found metabolism genes  
242 identified in the QTL-seq analysis, such as GST, aldo-keto reductase, and Beta-keto acyl  
243 synthase co-expressed with various transcription factors and other genes that could be involved  
244 in their regulation (Supplemental Figure 7a-b). An aldo-keto reductase was discovered through  
245 QTL-seq to be specific to the CC2 family that is also significantly upregulated in both the CC2  
246 and CC5 families. The HMG transcriptional regulator is also positively correlated with two  
247 genes involved in metabolism: Tubulin/FtsZ family gene and a Ubiquitin carboxyl-terminal  
248 hydrolase, and negatively correlated with an Alpha-N-acetylglucosaminidase, (Supplemental  
249 Figure 7e). In the CC5 family sub-graphs, we identified alternate active genetic machinery that  
250 are co-expressed with genes identified in the QTL regions, such as Cytochrome p450s,  
251 thioesterase, glycosyl hydrolase, pectinesterase, exostensin gene family, and others connected  
252 with various classes of transporters and transcription factors/regulators (Supplemental Figure 7c-  
253 d). The condition specific network also partitioned clusters of co-expressed gene interactions  
254 pairs in both a family specific and overlapping manner. For example, this approach also  
255 identified an aldo-keto reductase and protein tyrosine/serine/threonine kinase unique to CC2.  
256 Oxio-reductase, peroxidase, and vacuolar sorting were among CC5 specific clusters  
257 (Supplemental Figure 7f). This approach also identified a largely connected subgraph of  
258 connected genes discovered in both CC2 and CC5 bulk-segregant and RNA-seq analysis  
259 (Supplemental Figure 7g)

260

## 261 **Discussion.**

262 Despite the global distribution and impacts of weedy plants, few genomic resources have been  
263 developed to explore the genetics and evolution of weediness (see <sup>33</sup>). Here, we present a  
264 reference-grade genome assembly for Europe's worst agricultural weed <sup>21,23</sup>. Metrics for genome  
265 size, completeness, structure, and quality indicate that this *A. myosuroides* genome is the largest  
266 and highest quality weedy plant genome produced to date. The very high proportion of sequence  
267 identified as transposable elements (TE), particularly LTR-retrotransposons, provides context for  
268 the genome size and plasticity that drives rapid evolution of weediness in blackgrass. It is well  
269 known that high levels of TE activity (transcription and movement) can provide the impetus for

270 changes in gene expression, gene duplication, and genome organization, all of which can  
271 facilitate gene family evolution and the exaptation and co-option of genes to perform new  
272 functions, particularly in relation to biotic and abiotic stresses <sup>34</sup>.

273         The analysis of genome structure and duplication identifies further signatures of a  
274 dynamically evolving and plastic genome as the basis for rapid adaptation in blackgrass. There is  
275 an over-representation of expanded gene families, evidence for a relatively recent unique  
276 genome duplication event in blackgrass, and a general excess of duplicated genes. It is notable  
277 that the paralogous genes associated with this duplication event are located on chromosomes 1, 2  
278 and 3, where the densest regions of significant QTLs and differentially expressed genes are  
279 found (Fig 3). Also, expanded gene families included several gene functions that have been  
280 previously implicated in herbicide resistance and biotic and abiotic defense pathways. These  
281 features of the genome are consistent with a model that posits blackgrass weediness as an  
282 emergent property of a large and dynamic genome where rapid adaptation to new environmental  
283 stresses is enabled by exaptation of duplicated and differentially expressed genes under strong  
284 selective pressure <sup>35,36</sup>.

285         Herbicides exert intense selection pressure on weed populations. The genomic basis of  
286 monogenic, target site resistance is well known <sup>11</sup>, but with a few exceptions (for example <sup>37,38</sup>),  
287 explorations of non-target site herbicide resistance (NTSR) have been limited to transcriptomics-  
288 based approaches, which do not inform the genetic basis of resistance directly. Using F<sub>2</sub> seed  
289 families produced from two discrete NTSR genetic backgrounds, we demonstrate that NTSR is  
290 an oligogenic trait in blackgrass. Fifteen significant QTLs were identified (8 and 7 in the two  
291 seed families, respectively). Notably, there were no overlapping QTL regions between seed  
292 families derived from the two blackgrass populations, though significant QTLs were over-  
293 represented on chromosomes 2 and 3. These observations suggest that whilst selection for NTSR  
294 may be localized to certain regions of the genome, the genetic basis and genomic architecture of  
295 these traits is quite different amongst blackgrass populations. At the genomic level, evolution of  
296 NTSR amongst populations is divergent.

297         Our bulk segregant approach for sampling resistant and susceptible phenotypes  
298 identified a relatively small set of constitutively, differentially expressed genes (DEGs). As

299 observed for the genomic data, there was a strong signal for selection of different molecular  
300 genetic mechanisms of resistance in the two resistant populations. 53% of DEGs were specific to  
301 one of the seed families, and 36% were specific to the other. However, there is also evidence for  
302 some convergence at the transcriptional level with 11% of the resistance associated DEGs being  
303 common to both seed families. It is difficult to definitively conclude from our analysis if the 89%  
304 (575) of family specific DEGs represent large functional differences in the NTSR phenotype, the  
305 effects of alternate paralogous gene expression, or perhaps pleiotropic differences arising from  
306 the different genetic background and genomic architecture of NTSR in the two parental NTSR  
307 populations. Our co-expression network analysis provides some indication, however, that whilst  
308 the metabolic machinery of NTSR across populations has common features, there are discrete  
309 genomic, transcriptional, and metabolic bases to NTSR in different blackgrass populations.

310 The common set of 68 DEGs included several genes and gene families that have been  
311 implicated in previous studies of NTSR in blackgrass<sup>13,14</sup> and in other weed species with evolved  
312 NTSR<sup>39-44</sup>. The common DEGs are also over-represented on chromosomes 2 and 3 where most  
313 significant QTLs are found. We also note that a member of one of these gene families, the aldo-  
314 keto reductases, is closely linked to the most significant of our 15 QTL regions (chromosome 2,  
315 CC2 family). These differentially expressed gene families have roles in stress- and defense-  
316 related metabolism (Figures 4d and 4e) and are generally found to be expanded in blackgrass  
317 (Figures 2a and 2b). These findings add weight to our assertion that the rapid evolution of  
318 resistance and weediness in blackgrass is facilitated by its large, repetitive, and dynamic genome.

319 Access to a high-quality blackgrass genome has enabled us to identify several genomic  
320 features that can account for the weediness and adaptability of the species. Non-target site  
321 herbicide resistance is a complex trait that evolves repeatedly in blackgrass and other weedy  
322 plants, giving rise to a generalist resistance phenotype<sup>22</sup>. Here, we clearly establish that it is an  
323 oligogenic trait, but that the genetic basis of NTSR can be markedly different between wild,  
324 evolved populations; albeit underpinned by some common metabolic pathways and manifested  
325 through genes that are similarly differentially expressed. Our results are consistent with those of  
326 Giacomini, et al.<sup>45</sup> who found physical clustering of differentially expressed genes, and whilst  
327 we do not find overlapping QTLs, there is strong evidence for selection of NTSR within similar

328 genomic regions causing us to tentatively conclude that, as reported by Van Etten, et al. <sup>38</sup> and  
329 Kreiner, et al. <sup>37</sup>, landscape scale evolution of NTSR likely results from both parallel and non-  
330 parallel patterns of evolution across the genome. These findings have wide significance for  
331 understanding the potential for rapid plant adaptation under novel and changing environments.  
332 They suggest that large and plastic plant genomes harbor sufficient standing genetic variation to  
333 enable rapid adaptation to novel stresses. The associated duplication and redundancy in plant  
334 genomes means that adaptation may not be mutation-limited and that the repeated evolution of  
335 resistance and/or tolerance relies on neither rare mutational events, nor hard selective sweeps.  
336  
337

338 **Table and Figures:**

339 **Table 1 | Assembly statistics of the blackgrass genome.**

340

| <b>Characteristics</b>              | <b>Values</b> |
|-------------------------------------|---------------|
| Assembly size (bp)                  | 3,572,044,634 |
| Number of scaffolds                 | 2,512         |
| N50 scaffold length (bp)            | 2,255,730     |
| The largest scaffold (bp)           | 17,744,454    |
| Number of contigs                   | 7,866         |
| N50 contig length (bp)              | 1,189,615     |
| The largest contig (bp)             | 9,284,242     |
| GC content (%)                      | 44.66         |
| Total size of pseudomolecules (bp)  | 3,400,051,202 |
| Total size of unanchored sequences  | 171,993,432   |
| Ns in the assembly                  | 80,915,468    |
| Total size of retrotransposons (bp) | 2,302,477,515 |
| Total size of DNA transposons (bp)  | 507,120,408   |
| Total size of repeat sequences (bp) | 2,851,385,969 |
| Number of genes                     | 45,263        |
| Average length of genes (bp)        | 2,864         |
| Average number of exons per gene    | 4.3           |
| Total size of genes (bp)            | 129,639,341   |
| Number of annotated genes           | 35,999        |

341

342

343

344

345

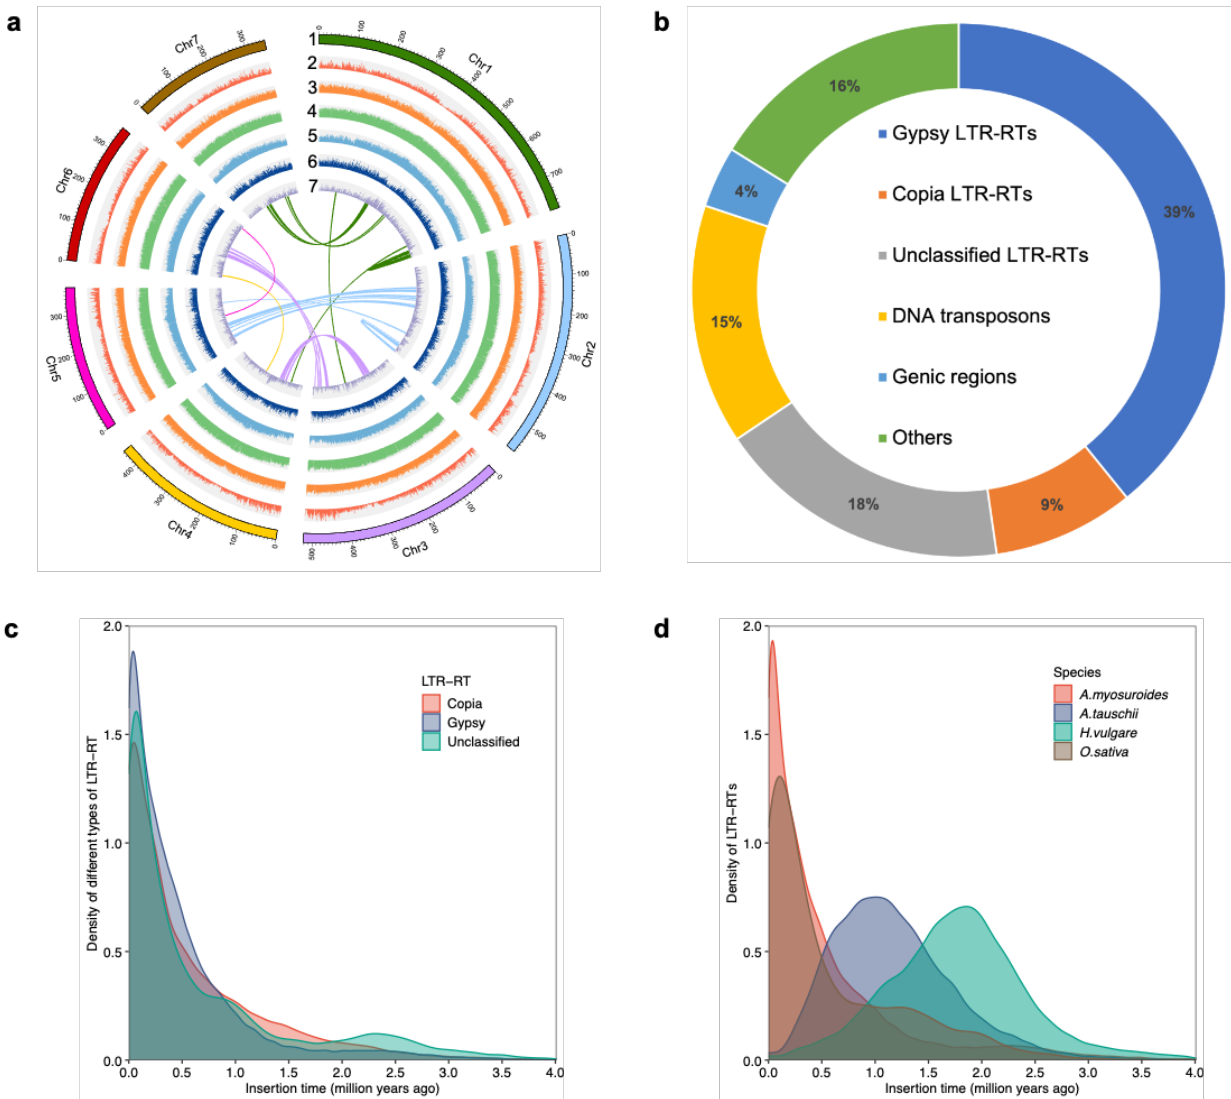

346  
347

348 **Figure 1 | Genomic features and components of the *A. myosuroides* genome.** **a**, overview of  
 349 the *A. myosuroides* genome, including the assembled seven chromosomes (1), distribution of  
 350 protein-coding genes (2), distribution of GC content across the genome (3), distribution of  
 351 transposable elements (4), distribution of *Gypsy* family of long terminal repeats retrotransposons  
 352 (5), distribution of *Copia* family of long terminal repeats retrotransposons (6), distribution of  
 353 SNP/Indel (7). All the histograms (from 1 to 7) were featured in a 1-Mb sliding window.  
 354 Connecting line in the center of the diagram represents a genomic syntenic region covering at  
 355 least 10 paralogues. **b**, Proportions of the major elements in the blackgrass genome, including  
 356 *Gypsy* LTR-RTs, *Copia* LTR-RTs, unclassified LTR-RTs, DNA transposons, coding DNA and  
 357 unannotated sequences. **c**, The insertion time distribution of different types of LTR-RT in the  
 358 blackgrass genome. **d**, The insertion time distribution of intact LTR-RTs in the blackgrass  
 359 genome compared to those in goatgrass (progenitor of the wheat D genome), barley and rice.  
 360

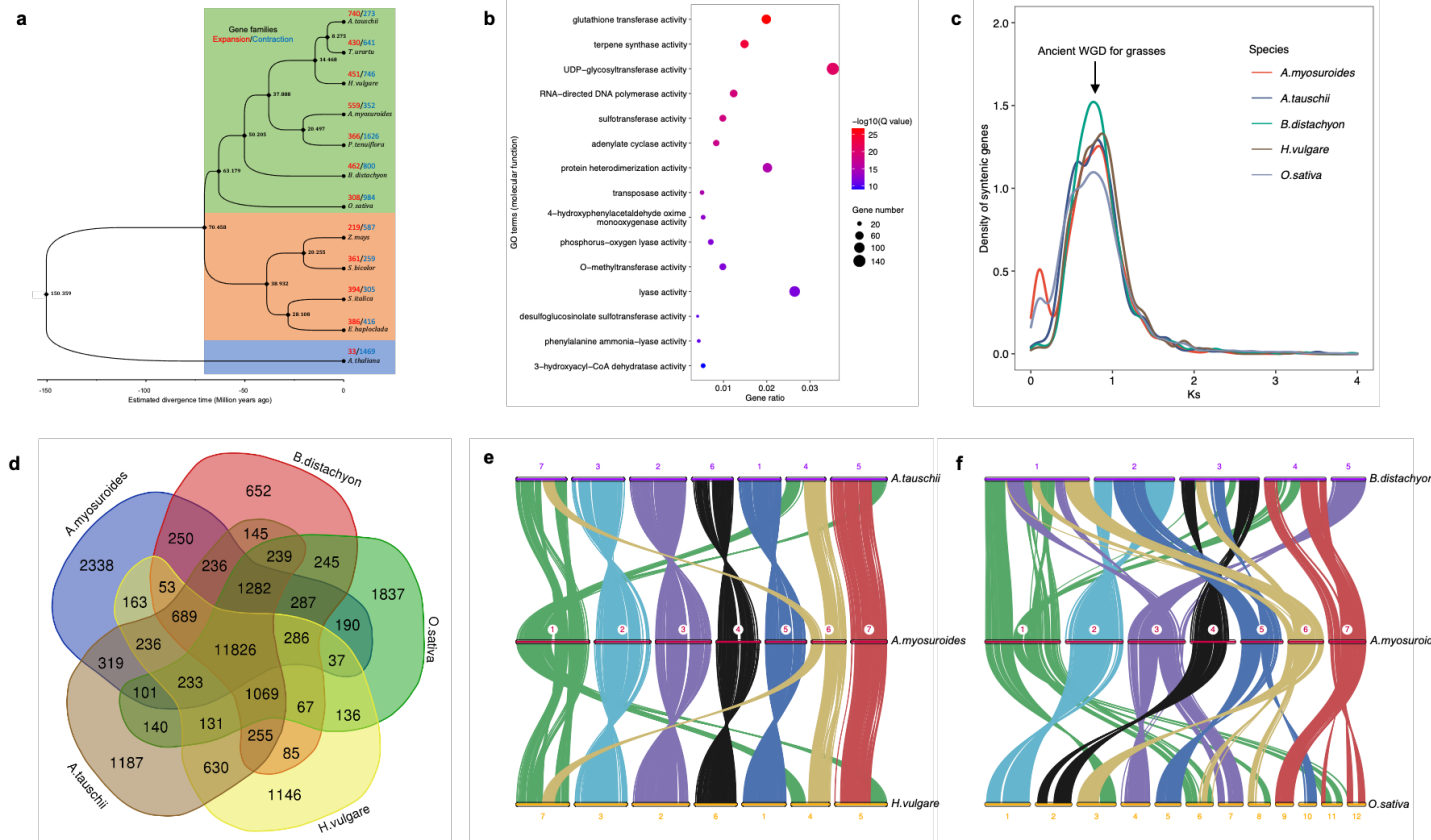

361  
362

363 **Figure 2 | Evolution and Comparative genomics of the *A. myosuroides* genome.**  
 364 Phylogenetic tree of 12 plant species and gene family expansion and contraction. Inferred  
 365 divergence time is denoted at each node in black. The red and blue numbers above the species  
 366 name indicate the total number of expanded and contracted gene families, respectively. **b**, Gene  
 367 Ontology (GO) enrichment analysis of expanded gene families in the blackgrass genome  
 368 (molecular function category). **c**, The frequency distribution of synonymous substitution rates  
 369 (Ks) of paralogous genes within each genome. A shared whole genome duplication event for  
 370 grasses was assigned to the peak. **d**, Venn diagram of shared and unique gene families among  
 371 five closely related Poaceae species. Each number represents the number of gene families. **e**,  
 372 Syntenic blocks between blackgrass and other sequenced grass genomes, including goatgrass and  
 373 barley. **f**, Syntenic blocks between blackgrass and other sequenced grass genomes, including  
 374 *Brachypodium* and rice.

375

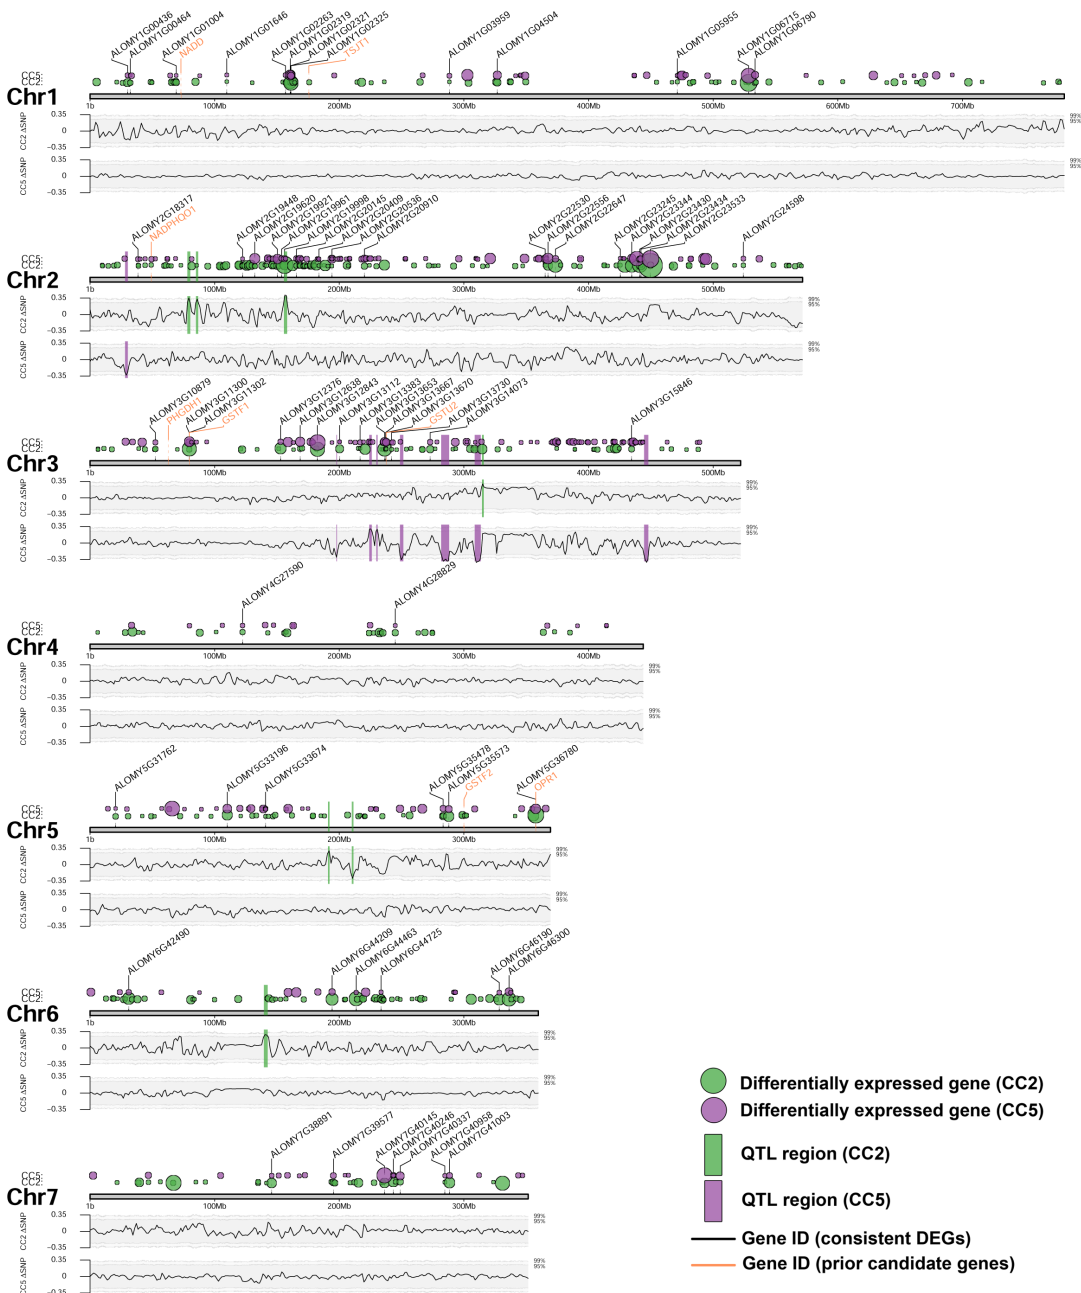

376  
377  
378  
379  
380  
381  
382  
383  
384  
385  
386

**Figure 3 | Location across the genome of the differentially expressed genes associated with the NTSR trait.** Green and purple circles show the position of DEGs identified in the CC5 and CC2 seed families respectively. Circle sizes are relative to the adjusted P-value, whereby larger circles denote stronger significance. DEGs consistent across both families are marked with black labels, while orange labels show the position of previously reported NTSR candidate genes. Lower sections show the change in  $\Delta$ SNP index across these chromosomes for the CC2 (top) and CC5 (bottom) families. Shaded regions represent the 95% and 99% confidence bounds for each SNP. Vertical green and purple bars show the QTL regions for the CC5 and CC2 families, identified from their  $\Delta$ SNP index.





395

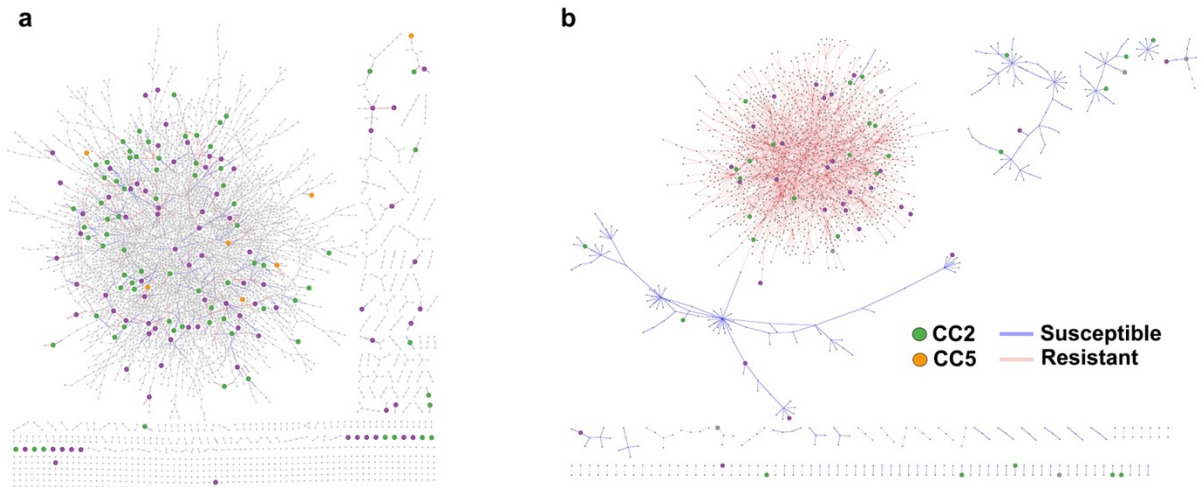

396

397

398

399

400

401

402

403

404

405

406

407

**Figure 5 | Genetic coordination of NTSR in CC2 and CC5.** **a**, traditional spearman-ranked gene coexpression network derived from RNAseq expression that depicts common and unique genetic architecture underpinning NTSR in both the CC2 and CC5 families. Green nodes are unique to CC2, purple nodes are unique to CC5, and orange are common between both families. The graph was filtered for nodes with at least 2 connections. **b**, a condition-specific gene coexpression network derived from the RNAseq data taking into consideration plant phenotype (herbicide susceptible/resistant).

408 **Methods**

409

410 **Plant materials for genome sequencing and annotation.** Blackgrass seeds collected in 2017  
411 from section 8 of the Rothamsted ‘Broadbalk’ long-term experiment <sup>46</sup> were used to derive an  
412 individual blackgrass plant for genome sequencing. Established in 1843, these field plots have  
413 never received herbicide application, and extensive testing of this population (Rothamsted) over  
414 the last 20 years has confirmed that it remains susceptible to all herbicides, representing a true  
415 wild-type blackgrass genotype. In addition, two field-collected blackgrass seed populations  
416 (Peldon and Lola91) previously characterized as being strongly non-target-site resistance  
417 (NTSR) to acetyl-CoA carboxylase (ACCase) inhibiting herbicides were used to generate F<sub>2</sub> seed  
418 families (named CC2 and CC5, respectively) for QTL-seq and RNA-seq analyses. Detailed  
419 protocols for the selection of a single herbicide sensitive plant for genome sequencing and for the  
420 development of CC2 and CC5 seed families is presented in the Supplementary Note.

421

422 **Genome survey.** Previous study has reported that blackgrass has seven chromosomes <sup>27</sup>. In this  
423 study, genome size was estimated through flow cytometry and k-mer based analysis. Flow  
424 cytometry was conducted on four field collected blackgrass populations (the Rothamsted,  
425 Lola91, and Peldon populations used within this study, along with a further herbicide susceptible  
426 population). Genome size estimates were generated for three replicate plants from each of these  
427 populations, against a known standard of the plant *Allium schoenoprasum*. Using these data, the  
428 blackgrass genome size was estimated as 3,312 – 3,423 Mb. K-mer based analysis from Illumina  
429 sequencing data derived from the Rothamsted population also indicated a genome size from  
430 3,400 Mb to 3,550 Mb. We also estimated the heterozygosity and repeat content of the

431 blackgrass genome with GCE package (<https://github.com/BioInfoTools/GCE>), the results  
432 suggest the blackgrass genome exhibits high level of heterozygosity (1.52%) and repeat content  
433 (84.2%). Due to the complexity of the blackgrass genome, we collected sequencing data from  
434 multiple sequencing platforms for genome assembling.

435

436 **Genome sequencing.** *Pacific Biosciences (PacBio) sequencing:* high molecular weight (HMW)  
437 DNA was extracted from leaf tissues of a single plant (Rothamsted) that had been dark adapted  
438 for five days, used to construct PacBio SMRTbell libraries using SMRTbell Express Template  
439 Prep Kit 2.0, following the manufacturers' protocols. SMRTbell libraries were sequenced on a  
440 PacBio Sequel II system and a total of six SMRT cells and 513 Gb (144 X coverage) data  
441 composed of ~42 million reads were generated.

442

443 *BioNano optical maps:* HMW DNA was isolated from the same leaf tissue according to the  
444 BioNano Prep Plant Tissue DNA isolation protocol, and then fluorescently labelled using single-  
445 sequence-specific DLE1 endonucleases based on BioNano's Direct Label and Stain (DLS)  
446 technology. The labelled DNA was loaded on the BioNano Genomics Saphyr system to scan by  
447 the sequencing provider. A total of 3,685,283 BioNano molecules were obtained with a total  
448 length of 860 Gb (241 X coverage).

449

450 *Chromosome conformation capture sequencing by Hi-C:* chromatin conformation capture data  
451 was generated using a Phase Genomics (Seattle, WA) Proximo Hi-C 2.0 Kit. Following the  
452 manufacturer's instructions for the kit, intact cells from two samples were crosslinked using a  
453 formaldehyde solution, digested using the Sau3AI restriction enzyme, and proximity ligated with

454 biotinylated nucleotides to create chimeric molecules composed of fragments from different  
455 regions of the genome that were physically proximal in vivo, but not necessarily genomically  
456 proximal. Continuing with the manufacturer's protocol, molecules were pulled down with  
457 streptavidin beads and processed into an Illumina-compatible sequencing library. Sequencing  
458 was performed on an Illumina HiSeq 4000 system, yielding 126 Gb (35 X coverage) data.

459

460 *Illumina short reads for polishing:* DNA was extracted with the DNeasy Plant Mini Kit  
461 (QIAGEN) to prepare PCR-free paired-end libraries using the Illumina Genomic DNA Sample  
462 Preparation kit following the manufacturer's instructions (Illumina). All paired-end libraries  
463 were sequenced on an Illumina NovaSeq 6000 system, generating 291 Gb (81 X coverage) of  
464 150-nucleotide paired-end reads.

465

466 **Genome assembly.** We performed de novo assembly of PacBio long reads into contigs with  
467 MECAT2<sup>47</sup>. This produced 12,107 contigs with an N50 of 0.9 Mb and a total size of 4,906 Mb.

468 To improve the accuracy of the assembled contigs, two polishing strategies were performed  
469 including PacBio long reads polishing using Arrow program

470 (<https://github.com/PacificBiosciences/SMRT-Link>) and Illumina short reads polishing using

471 Pilon (v.1.20)<sup>48</sup>. Polished contigs were repeat marked using WindowMasker<sup>49</sup> and then

472 subjected to haplotype merging using HaploMerger2<sup>50</sup> in terms of the heterozygosity of the

473 blackgrass genome. BioNano data were first filtered based on molecule length (> 150Kb) and

474 then aligned to primary contigs to select mapped molecules for de novo assembly to obtain the

475 BioNano optical maps. The primary contigs and BioNano maps were combined to produce the

476 hybrid scaffold assembly. The Hi-C reads were aligned to the hybrid scaffold assembly using the

477 Juicer pipeline <sup>51</sup> and the hybrid scaffolds was then further scaffolded using the 3D-DNA  
478 pipeline <sup>52</sup>. The results were manually examined using the Juicebox Assembly Tools, an  
479 assembly-specific module in the Juicebox visualization system <sup>53</sup>. The Hi-C scaffolding resulted  
480 in seven pseudomolecule chromosomes. We performed gap filling using Cobbler (v0.6.1) <sup>54</sup> to  
481 eliminate the gaps generated in the scaffolding steps with PacBio long reads. In addition, the  
482 final assembled scaffolds were further polished using PacBio long reads with Arrow and  
483 Illumina short reads with Pilon <sup>48</sup>. The detailed information is presented in the Supplementary  
484 Note.

485

486 **Genome assembly quality assessment.** The quality of the assembled genome was evaluated by  
487 the following analyses. (1) The Illumina short reads used for polishing were mapped to the  
488 genome assembly using BWA-MEM, the mapping rate and genome coverage were examined.  
489 (2) The genome assembly was subjected to BUSCO (v.4.0.1) <sup>25</sup> analysis to assess the  
490 completeness of the assembly with the embryophyta\_odb10 database. (3) The LRT Assembly  
491 Index <sup>26</sup> was calculated for assessing the genome assembly quality. (4) The assembled  
492 chromosome length was compared to the cytogenic chromosome length to check the correlation.  
493 The cytogenic chromosome length information has been reported in <sup>27</sup>.

494

495 **Genome annotation.** A comprehensive non-redundant repeat library for the blackgrass genome  
496 was built using EDTA, a de novo transposable element (TE) annotator that integrates structure-  
497 and homology-based approaches for TE identification <sup>55</sup>. The EDTA pipeline incorporates  
498 LTRharvest, the parallel version of LTR\_FINDER, LTR\_retriever, GRF, TIR-Learner,  
499 HelitronScanner, and RepeatModeler as well as customized filtering scripts. Genome-wide

500 prediction of ncRNAs, such as rRNA, small nuclear RNA and miRNA, was performed using  
501 INFERNAL software <sup>56</sup> with search against the Rfam database. The tRNA genes were predicted  
502 using tRNAscan-SE program <sup>57</sup>.

503

504 Protein-coding genes were predicted by a combination of de novo prediction, homology-based  
505 and transcriptome-based strategies. SNAP <sup>58</sup>, AUGUSTUS <sup>59</sup> and GeneMark <sup>60</sup> were used for ab  
506 initio gene predictions. For homology-based prediction, protein sequences of seven species  
507 (*A.thaliana*, *O.sativa*, *S.bicolor*, *B.distachyon*, *H.vulgare*, *Z.mays* and *T.aestivum*) were aligned  
508 to the genome assembly using GeMoMa program <sup>61</sup> to provide homology-based evidence. For  
509 transcriptome-based prediction, RNA-seq data were generated from the range of harvested  
510 blackgrass tissues (leaf, main stem, root, developing flowers, mature flowers pre-anthesis, and  
511 mature flowers with pollen). RNA-seq reads were processed to remove adapters and low-quality  
512 bases and assembled both de novo and genome guided using Trinity (v.2.4.0) <sup>62</sup> followed by the  
513 PASA program (<http://pasapipeline.github.io>) to improve the gene structures. All predicted gene  
514 structures were integrated into consensus gene models using EVIDENCEModeler <sup>63</sup>. Functional  
515 annotation of protein-coding genes was carried out by comparing against SwissProt, GenBank  
516 nonredundant protein (NR), InterProScan and EggNOG databases. GO term for each gene was  
517 obtained from the corresponding InterPro descriptions. Additionally, the gene set was mapped to  
518 the KEGG pathway database using the online tool ‘BlastKOALA’  
519 (<https://www.kegg.jp/blastkoala/>) <sup>64</sup>.

520

521 **Long terminal repeat retrotransposons (LTR-RTs) insertion time estimation.** As the direct  
522 repeat of an LTR-RT is identical upon insertion, the divergence between the LTR of an

523 individual element reflects the time of the insertion. The insertion date (T) for each LTR-RT was  
524 computed by  $T = K/2\mu$ , where K is the divergence rate and  $\mu$  is the neutral mutation rate ( $K = -$   
525  $3/4 * \ln(1-d*4/3)$ ,  $\mu = 1.3 \times 10^{-8}$ ). Sequence identity (%) between the 5' and 3' direct repeats of an  
526 LTR candidate is approximated using blastn, so the proportion of sequence differences is  
527 calculated as  $d = 100\% - \text{identity}\%$ .

528

529 **Phylogeny and gene family.** To identify orthologous and paralogous gene clusters, protein-  
530 coding genes from blackgrass and 11 other species (*A. tauschii*, *T. urartu*, *H. vulgare*, *P. tenuiflora*,  
531 *B. distachyon*, *O. sativa*, *Z. mays*, *S. bicolor*, *S. italica*, *E. haploclada*, *A. thaliana*) were analyzed  
532 using Orthofinder2 (v2.5.1) <sup>65</sup>. In cases where there were multiple transcript variants, the longest  
533 transcript was selected to represent the coding region. A total of 476 single-copy orthologous  
534 genes were identified. Single-copy genes from each species were aligned using MUSCLE <sup>66</sup> and  
535 the alignments were concatenated. The concatenated alignment was subsequently used to  
536 construct a maximum likelihood phylogenetic tree using RAxML <sup>67</sup>. The MCMCTree program <sup>68</sup>  
537 of PAML <sup>69</sup> was used to estimate the divergence time among 12 species. Three calibration time  
538 points were used based on previous publications and TimeTree website  
539 (<http://www.timetree.org>) as normal priors to restrain the age of the node, including 146-154  
540 Mya between Arabidopsis and rice, 68-72 Mya between rice and sorghum, and 49-53 Mya  
541 between barley and Brachypodium. The gene family expansion and contraction were determined  
542 by comparing the gene cluster size differences between the ancestor and each species using  
543 CAFÉ program <sup>70</sup>.

544



545 **Whole genome duplication and comparative genomic.** To study the whole genome duplication  
546 events in the blackgrass genome, we performed the self-alignment within the blackgrass genome  
547 using LAST (v963)<sup>71</sup> and the syntenic blocks were identified using MCscanX<sup>72</sup>. For each gene  
548 pair within syntenic blocks, the synonymous divergence levels (Ks) were calculated using the  
549 YN model in KaKs\_Calculator<sup>73</sup>. The Ks values of all gene pairs were plotted to identify the  
550 putative whole genome duplication events. To identify syntenic blocks between blackgrass and  
551 the other four species (*H.vulgare*, *A.tauschii*, *B.distachyon*, *O.sativa*), all-against-all BLASTP (E  
552 value <  $1 \times 10^{-5}$ ) was performed for the protein-coding gene set of each genome pair. Syntenic  
553 blocks were defined based on the presence of at least five synteny gene pairs using the  
554 MCScanX package<sup>72</sup> with default settings.

555

556 **QTL-seq (Bulk segregant analysis of SNPs).** Leaf tissue was harvested from the unsprayed  
557 tiller of all 25 ‘R’ and ‘S’ plants from each F<sub>2</sub> family. In all cases, young leaf material was  
558 collected over one hour at midday, harvesting tissue from each plant into separate 5ml Eppendorf  
559 tubes. Each sample was immediately flash frozen in liquid nitrogen and stored at -80°C before  
560 use. For grinding, samples were kept cooled in liquid Nitrogen and homogenised using a micro-  
561 pestle. For bulk segregant analysis, four bulks were made by pooling DNA from all 25 selected  
562 individuals in each phenotypic group (herbicide resistant ‘R’, and susceptible ‘S’, in each of the  
563 CC2 and CC5 F<sub>2</sub> families). Illumina paired-end reads were processed to remove adapters and  
564 low-quality sequences using Trimmomatic<sup>74</sup>. Cleaned reads were mapped to the blackgrass  
565 reference genome using BWA. Variants were called using BCFtools ([http://samtools.github.io/](http://samtools.github.io/bcftools)  
566 [bcftools](http://vcftools.sourceforge.net)) and filtered using VCFtools (<http://vcftools.sourceforge.net>). QTL-seq pipeline was

567 used for calculating the SNP-index, the  $\Delta$ SNP- index was then calculated by subtracting the  
568 SNP-index of one bulk from that of another bulk <sup>30</sup>.

569

570 **RNA-seq analysis.** An RNA-seq analysis was also conducted using the 25-herbicide resistant  
571 ‘R’ and susceptible ‘S’ plants from identified from each F<sub>2</sub> family. For each phenotypic group,  
572 five replicate RNA-bulks were created by pooling RNA from five individual plants. RNA was  
573 sequenced using standard Illumina TruSeq mRNAseq protocols. The quality of the RNA  
574 sequences derived from each sample was assessed using FastQC v0.11.8 <sup>75</sup> and preprocessed to  
575 remove the leading 10 bases from each read and any Illumina adapter sequences, together with  
576 any remaining reads shorter than 50 bases for adapters and low quality bases with Trimmomatic  
577 <sup>74</sup>. The trimmed reads for each sample were mapped to the *Alopecurus myosuroides* genome  
578 using Hisat2 v2.2.1 <sup>76</sup> with default parameters except for minimum alignment score parameters  
579 of L, 0, -0.6. Reads that mapped to coding sequences of annotated genes were counted using  
580 featureCounts v1.6.4 <sup>77</sup> with default settings. Differential gene expression between samples was  
581 analysed in R version 4.0.2 <sup>78</sup> using DeSeq2 <sup>79</sup>.

582 The expression of all technical replicates was checked prior to analysis. First, all counts data  
583 were transformed using the regularised log-transform function ‘rlog()’ of the DESeq2 package.  
584 Transformed data were then visualised using both a principal components analysis (PCA), and  
585 hierarchical clustering of the Euclidean distance between samples. Visual inspection of these  
586 results identified one clear outlier sample (CC5 ‘S’ sample A), which was excluded from further  
587 analysis. A pre-filtering step was used to remove genes with zero or low counts before  
588 differential expression analysis. First, counts were summed across technical replicates to leave  
589 only biological samples. Next, genes were removed if they did not have at least one read per

590 million in at least four samples (where four is equal to the minimum number of reps per  
591 treatment level) as per Anders, et al.<sup>80</sup>. The filtered, biological replicates were analysed using  
592 the ‘DESeq()’ function of the DESeq2 package in R, specifying four phenotypic groups: CC2  
593 ‘S’, CC2 ‘R’, CC5 ‘S’, and CC5 ‘R’. In total, 19,937 genes and 19 biological replicate samples  
594 were included in this analysis. To generate lists of differentially expressed genes (DEGs),  
595 specific comparisons were extracted for the ‘R’ vs ‘S’ samples within each family from this  
596 fitted model. Only genes which were significant ( $P < 0.05$ ) and with at least 1.5x fold difference in  
597 expression were categorised as differentially expressed. The resultant lists of DEGs for the CC2  
598 and CC5 families were then intersected, to identify DEGs common to both.

599 Gene ontology information was combined from the Swissprot, Egnog, and Interpro annotation  
600 files to create a single Gene:GO association map, containing 905,051 associations between  
601 28,498 genes and 13,192 GO terms. Gene ontology enrichment analysis was performed for the  
602 DEGs using the ‘goseq()’ function of the goseq R package<sup>78</sup>. The Gene:GO association map was  
603 specified as a custom gene category mapping to use for analysis, and enrichment scores for each  
604 gene ontology term were calculated using the Wallenius method (see Young, et al.<sup>81</sup>). Resultant  
605 P-values were adjusted using the Benjamini and Hochberg method to further control the false  
606 discovery rate.

607 **Gene co-expression network construction.** Trimmed means of M-values (TMM) were  
608 calculated from mapped RNAseq data using the edge-R package in R<sup>82</sup> to construct a gene  
609 expression matrix (GEM). The GEM was  $\log_2$  transformed and quantile normalized using  
610 custom scripts in R<sup>78</sup>. The traditional gene co-expression network (GCN) was created using the  
611 Knowledge Independent Network Construction tool (KINC v.3.4.0)<sup>83</sup>. A gene correlation  
612 matrix was constructed using the Spearman rank correlation coefficient approach<sup>84</sup> with the

613 following KINC specific parameters: --minsamp 15 --minexp -inf --mincorr 0.5 --maxcorr 0.99.  
614 A threshold for correlation was determined using the random matrix theory approach (RMT) in  
615 KINC with the following parameters: --tstart 0.95 --tstep 0.001 tstop 0.5 --threads 1 --epsilon 1e-6  
616 --mineigens 50 --spline true --minspace 10 --maxpace 40 --bins 60 and was determined to be  
617 0.919. The network was extracted using the extract function in KINC and visualized in  
618 Cytoscape v.3.9.0<sup>85</sup>. The condition specific GCN was constructed using the same GEM and  
619 Spearman ranked correlation coefficient approach in KINC, but also incorporated a Gaussian  
620 mixed model (GMM) to determine differentially expressed gene pair clusters that represent  
621 condition specific sub-graphs. Low powered edges were determined and filtered with the “  
622 corrpwr” function in KINC with an alpha of 0.001 and power of 0.8. An annotation file was  
623 prepared in text format with samples either being annotated as “resistant” or “susceptible” and  
624 used to run the “cond-test”. Condition specific sub-graphs were extracted and visualized in  
625 Cytoscape v.3.9.0<sup>85</sup>.

626

627

## 628 **Acknowledgements**

629 DC, DM and PN were supported by the Smart Crop Protection Industrial Strategy Challenge  
630 Fund (grant no. BBS/OS/CP/000001) and Rothamsted Research as part of the Lawes  
631 Agricultural Trust. CS was supported by the Clemson University Research Fellows program.  
632 Rothamsted Research, Clemson University and Bayer Crop Science were equal contributors to  
633 costs associated with genomic and transcriptomic sequencing. The authors wish to thank Richard  
634 Hull and Laura Crook (Rothamsted Research, RR) for the growth and maintenance of plant  
635 material throughout this study, and David Hughes (RR) for bioinformatics assistance and advice.

636

637 **Author Contributions**

638 PN, CS, and RB conceived the study and assembled project funding. CL, DC, and PN provided  
639 characterised plant material for sequencing. LC and CS assembled and annotated the blackgrass  
640 genome. LC, DC and CS analysed genomics and transcriptomics data sets and PN, DM and RB  
641 contributed to discussion and interpretation of data. LC, DC, CS and PN wrote the first draft of  
642 the paper and all authors contributed to subsequent editing and improvement.

643

644 **Competing Interests**

645 The authors declare that they have no competing interests.

646

647 **Data accessibility**

648 \*\* All sequence data will be archived in publicly available databases prior to final acceptance  
649 and publication of this article.

650

## 651 Literature Cited

- 652 1. Palumbi, S.R. Humans as the Worlds Greatest Evolutionary Force. *Science* **293**, 1786  
653 (2001).
- 654 2. Hendry, A.P. *et al.* Evolutionary principles and their practical application. *Evolutionary*  
655 *Applications* **4**, 159-183 (2011).
- 656 3. Mahaut, L. *et al.* Weeds: Against the Rules? *Trends in Plant Science* **25**, 1107-1116  
657 (2020).
- 658 4. Baucom, R.S. Evolutionary and ecological insights from herbicide-resistant weeds: what  
659 have we learned about plant adaptation, and what is left to uncover? *New Phytologist*  
660 **223**, 68-82 (2019).
- 661 5. Kreiner, J., Stinchcombe, J. & Wright, S. Population Genomics of Herbicide Resistance:  
662 Adaptation via Evolutionary Rescue. *Annual review of plant biology* **69**, 611-635 (2018).
- 663 6. Neve, P., Vila-Aiub, M. & Roux, F. Evolutionary-thinking in agricultural weed  
664 management. *New Phytologist* **184**, 783-793 (2009).
- 665 7. Vigueira, C.C., Olsen, K.M. & Caicedo, A.L. The red queen in the corn: agricultural weeds  
666 as models of rapid adaptive evolution. *Heredity* **110**, 303-311 (2013).
- 667 8. Gould, F., Brown, Z.S. & Kuzma, J. Wicked evolution: Can we address the sociobiological  
668 dilemma of pesticide resistance? *Science* **360**, 728-732 (2018).
- 669 9. Heap, I. Global perspective of herbicide-resistant weeds. *Pest Management Science* **70**,  
670 1306-1315 (2014).
- 671 10. Powles, S. & Yu, Q. Evolution in Action: Plants Resistant to Herbicides. *Annual Review of*  
672 *Plant Biology* **61**, 317-347 (2010).
- 673 11. Gaines, T.A. *et al.* Mechanisms of evolved herbicide resistance. *J Biol Chem* **295**, 10307-  
674 10330 (2020).
- 675 12. Franco-Ortega, S. *et al.* Non-target Site Herbicide Resistance Is Conferred by Two  
676 Distinct Mechanisms in Black-Grass (*Alopecurus myosuroides*). *Frontiers in Plant Science*  
677 **12**(2021).
- 678 13. Tétard-Jones, C. *et al.* Changes in the proteome of the problem weed blackgrass  
679 correlating with multiple-herbicide resistance. *The Plant Journal* **94**, 709-720 (2018).
- 680 14. Cummins, I. *et al.* Key role for a glutathione transferase in multiple-herbicide resistance  
681 in grass weeds. *Proceedings of the National Academy of Sciences* **110**, 5812-5817 (2013).
- 682 15. Délye, C. Unravelling the genetic bases of non-target-site-based resistance (NTSR) to  
683 herbicides: a major challenge for weed science in the forthcoming decade. *Pest*  
684 *Management Science* **69**, 176-187 (2013).
- 685 16. Himme, M.v. & Bulcke, R. The distribution, spread and importance of *Alopecurus*  
686 *myosuroides* Huds. in Europe. in *Symposium on Status, Biology and Control of*  
687 *Grassweeds in Europe, organised by E.W.R.S. and COLUMA, Paris 1975* Vol. 2 23-54  
688 (Paris,, 1975).
- 689 17. Hicks, H. *et al.* Characterizing the environmental drivers of the abundance and  
690 distribution of *Alopecurus myosuroides* on a national scale. *Pest Management Science*  
691 **77**, 2726-2736 (2021).

- 692 18. Menchari, Y., Délye, C. & Le Corre, V. Genetic variation and population structure in  
693 black-grass (*Alopecurus myosuroides* Huds.), a successful, herbicide-resistant, annual  
694 grass weed of winter cereal fields. *Molecular Ecology* **16**, 3161-3172 (2007).
- 695 19. Rosenhauer, M., Jaser, B., Felsenstein, F.G. & Petersen, J. Development of target-site  
696 resistance (TSR) in *Alopecurus myosuroides* in Germany between 2004 and 2012.  
697 *Journal of Plant Diseases and Protection* **120**, 179-187 (2013).
- 698 20. Liu, X. *et al.* Managing herbicide resistance in China. *Weed Science* **69**, 4-17 (2021).
- 699 21. Hicks, H.L. *et al.* The factors driving evolved herbicide resistance at a national scale.  
700 *Nature Ecology & Evolution* **2**, 529-536 (2018).
- 701 22. Comont, D. *et al.* Evolution of generalist resistance to herbicide mixtures reveals a trade-  
702 off in resistance management. *Nature Communications* **11**, 3086 (2020).
- 703 23. Varah, A. *et al.* The costs of human-induced evolution in an agricultural system. *Nature*  
704 *Sustainability* **3**, 63-71 (2020).
- 705 24. Ravet, K. *et al.* The power and potential of genomics in weed biology and management.  
706 *Pest Management Science* **74**, 2216-2225 (2018).
- 707 25. Simão, F.A., Waterhouse, R.M., Ioannidis, P., Kriventseva, E.V. & Zdobnov, E.M. BUSCO:  
708 assessing genome assembly and annotation completeness with single-copy orthologs.  
709 *Bioinformatics* **31**, 3210-3212 (2015).
- 710 26. Ou, S., Chen, J. & Jiang, N. Assessing genome assembly quality using the LTR Assembly  
711 Index (LAI). *Nucleic acids research* **46**, e126-e126 (2018).
- 712 27. Johnsson, H. MEIOTIC ABERRATIONS AND STERILITY IN ALOPECURUS MYOSUROIDES  
713 HUDS. *Hereditas* **30**, 469-566 (1944).
- 714 28. Fedoroff, N. Transposons and genome evolution in plants. *Proc Natl Acad Sci U S A* **97**,  
715 7002-7 (2000).
- 716 29. Paterson, A.H., Bowers, J.E. & Chapman, B.A. Ancient polyploidization predating  
717 divergence of the cereals, and its consequences for comparative genomics. *Proc Natl*  
718 *Acad Sci U S A* **101**, 9903-8 (2004).
- 719 30. Takagi, H. *et al.* QTL-seq: rapid mapping of quantitative trait loci in rice by whole  
720 genome resequencing of DNA from two bulked populations. *The Plant journal : for cell*  
721 *and molecular biology* **74**, 174-183 (2013).
- 722 31. Kumar, R. *et al.* Whole genome re-sequencing-based QTL-seq identified candidate genes  
723 and molecular markers for fresh seed dormancy in groundnut. *Plant Biotechnology*  
724 *Journal* **0**(2019).
- 725 32. Pan, L. *et al.* Aldo-keto Reductase Metabolizes Glyphosate and Confers Glyphosate  
726 Resistance in *Echinochloa colona*. *Plant Physiol* **181**, 1519-1534 (2019).
- 727 33. Sharma, G., Barney, J.N., Westwood, J.H. & Haak, D.C. Into the weeds: new insights in  
728 plant stress. *Trends in Plant Science* **26**, 1050-1060 (2021).
- 729 34. Galindo-González, L., Mhiri, C., Deyholos, M.K. & Grandbastien, M.-A. LTR-  
730 retrotransposons in plants: Engines of evolution. *Gene* **626**, 14-25 (2017).
- 731 35. Otto, S.P. & Whitton, J. Polyploid incidence and evolution. *Annu Rev Genet* **34**, 401-437  
732 (2000).
- 733 36. Crow, K.D. & Wagner, G.P. What Is the Role of Genome Duplication in the Evolution of  
734 Complexity and Diversity? *Molecular Biology and Evolution* **23**, 887-892 (2005).

- 735 37. Kreiner, J.M., Tranel, P.J., Weigel, D., Stinchcombe, J.R. & Wright, S.I. The genetic  
736 architecture and population genomic signatures of glyphosate resistance in *Amaranthus*  
737 *tuberculatus*. *Molecular Ecology* **n/a**(2021).
- 738 38. Van Etten, M., Lee, K.M., Chang, S.-M. & Baucom, R.S. Parallel and nonparallel genomic  
739 responses contribute to herbicide resistance in *Ipomoea purpurea*, a common  
740 agricultural weed. *PLOS Genetics* **16**, e1008593 (2020).
- 741 39. Torra, J. *et al.* Target-Site and Non-target-Site Resistance Mechanisms Confer Multiple  
742 and Cross-Resistance to ALS and ACCase Inhibiting Herbicides in *Lolium rigidum* From  
743 Spain. *Frontiers in plant science* **12**, 625138-625138 (2021).
- 744 40. Suzukawa, A.K., Bobadilla, L.K., Mallory-Smith, C. & Brunharo, C.A.C.G. Non-target-Site  
745 Resistance in *Lolium* spp. Globally: A Review. *Frontiers in Plant Science* **11**(2021).
- 746 41. Wang, J. *et al.* Pro-197-Ser Mutation in ALS and High-Level GST Activities: Multiple  
747 Resistance to ALS and ACCase Inhibitors in *Beckmannia syzigachne*. *Frontiers in Plant*  
748 *Science* **11**(2020).
- 749 42. Davies, L.R., Onkokesung, N., Brazier-Hicks, M., Edwards, R. & Moss, S. Detection and  
750 characterisation of resistance to acetolactate synthase inhibiting herbicides in *Anisantha*  
751 and *Bromus* species in the United Kingdom. *Pest Manag Sci* (2020).
- 752 43. Fang, J. *et al.* Target-Site and Metabolic Resistance Mechanisms to Penoxsulam in  
753 Barnyardgrass (*Echinochloa crus-galli* (L.) P. Beauv). *Journal of Agricultural and Food*  
754 *Chemistry* **67**, 8085-8095 (2019).
- 755 44. Yang, Q. *et al.* Metabolic resistance to acetolactate synthase (ALS)-inhibiting herbicide  
756 tribenuron-methyl in *Descurainia sophia* L. mediated by cytochrome P450 enzymes.  
757 *Journal of agricultural and food chemistry* (2018).
- 758 45. Giacomini, D.A. *et al.* Coexpression Clusters and Allele-Specific Expression in  
759 Metabolism-Based Herbicide Resistance. *Genome Biol Evol* **12**, 2267-2278 (2020).
- 760 46. Moss, S.R., Storkey, J., Cussans, J.W., Perryman, S.A.M. & Hewitt, M.V. The Broadbalk  
761 long-term experiment at Rothamsted: what has it told us about weeds? *Weed Science*  
762 **52**, 864-873 (2004).
- 763 47. Xiao, C.-L. *et al.* MECAT: fast mapping, error correction, and de novo assembly for single-  
764 molecule sequencing reads. *Nature Methods* **14**, 1072-1074 (2017).
- 765 48. Walker, B.J. *et al.* Pilon: an integrated tool for comprehensive microbial variant  
766 detection and genome assembly improvement. *PLoS one* **9**, e112963-e112963 (2014).
- 767 49. Morgulis, A., Gertz, E.M., Schaffer, A.A. & Agarwala, R. WindowMasker: window-based  
768 masker for sequenced genomes. *Bioinformatics* **22**, 134-141 (2005).
- 769 50. Huang, S., Kang, M. & Xu, A. HaploMerger2: rebuilding both haploid sub-assemblies  
770 from high-heterozygosity diploid genome assembly. *Bioinformatics (Oxford, England)* **33**,  
771 2577-2579 (2017).
- 772 51. Durand, N.C. *et al.* Juicer Provides a One-Click System for Analyzing Loop-Resolution Hi-C  
773 Experiments. *Cell systems* **3**, 95-98 (2016).
- 774 52. Dudchenko, O. *et al.* De novo assembly of the *Aedes aegypti* genome using Hi-C yields  
775 chromosome-length scaffolds. *Science (New York, N.Y.)* **356**, 92-95 (2017).
- 776 53. Durand, N.C. *et al.* Juicebox Provides a Visualization System for Hi-C Contact Maps with  
777 Unlimited Zoom. *Cell systems* **3**, 99-101 (2016).



- 778 54. Warren, R.L. RAILS and Cobbler: Scaffolding and automated finishing of draft genomes  
779 using long DNA sequences. *The Journal of Open Source Software* **1**, 116 (2016).
- 780 55. Ou, S. *et al.* Benchmarking transposable element annotation methods for creation of a  
781 streamlined, comprehensive pipeline. *Genome biology* **20**, 275-275 (2019).
- 782 56. Nawrocki, E.P., Kolbe, D.L. & Eddy, S.R. Infernal 1.0: inference of RNA alignments.  
783 *Bioinformatics* **25**, 1713-1713 (2009).
- 784 57. Lowe, T.M. & Eddy, S.R. tRNAscan-SE: a program for improved detection of transfer RNA  
785 genes in genomic sequence. *Nucleic acids research* **25**, 955-964 (1997).
- 786 58. Korf, I. Gene finding in novel genomes. *BMC Bioinformatics* **5**, 59 (2004).
- 787 59. Stanke, M. *et al.* AUGUSTUS: ab initio prediction of alternative transcripts. *Nucleic acids*  
788 *research* **34**, W435-W439 (2006).
- 789 60. Lomsadze, A., Ter-Hovhannisyanyan, V., Chernoff, Y.O. & Borodovsky, M. Gene  
790 identification in novel eukaryotic genomes by self-training algorithm. *Nucleic acids*  
791 *research* **33**, 6494-6506 (2005).
- 792 61. Keilwagen, J., Hartung, F. & Grau, J. GeMoMa: Homology-Based Gene Prediction  
793 Utilizing Intron Position Conservation and RNA-seq Data. in *Methods in Molecular*  
794 *Biology* 161-177 (Springer New York, 2019).
- 795 62. Haas, B.J. *et al.* De novo transcript sequence reconstruction from RNA-seq using the  
796 Trinity platform for reference generation and analysis. *Nature protocols* **8**, 1494-1512  
797 (2013).
- 798 63. Haas, B.J. *et al.* Automated eukaryotic gene structure annotation using  
799 EVIDENCEModeler and the Program to Assemble Spliced Alignments. *Genome biology* **9**,  
800 R7-R7 (2008).
- 801 64. Kanehisa, M., Sato, Y. & Morishima, K. BlastKOALA and GhostKOALA: KEGG Tools for  
802 Functional Characterization of Genome and Metagenome Sequences. *Journal of*  
803 *Molecular Biology* **428**, 726-731 (2016).
- 804 65. Emms, D.M. & Kelly, S. OrthoFinder: solving fundamental biases in whole genome  
805 comparisons dramatically improves orthogroup inference accuracy. *Genome biology* **16**,  
806 157-157 (2015).
- 807 66. Edgar, R.C. MUSCLE: multiple sequence alignment with high accuracy and high  
808 throughput. *Nucleic acids research* **32**, 1792-1797 (2004).
- 809 67. Stamatakis, A. RAxML version 8: a tool for phylogenetic analysis and post-analysis of  
810 large phylogenies. *Bioinformatics (Oxford, England)* **30**, 1312-1313 (2014).
- 811 68. Yang, Z. & Rannala, B. Bayesian Estimation of Species Divergence Times Under a  
812 Molecular Clock Using Multiple Fossil Calibrations with Soft Bounds. *Molecular Biology*  
813 *and Evolution* **23**, 212-226 (2005).
- 814 69. Yang, Z. PAML 4: phylogenetic analysis by maximum likelihood. *Mol Biol Evol* **24**, 1586-  
815 91 (2007).
- 816 70. De Bie, T., Cristianini, N., Demuth, J.P. & Hahn, M.W. CAFE: a computational tool for the  
817 study of gene family evolution. *Bioinformatics* **22**, 1269-1271 (2006).
- 818 71. Kiełbasa, S.M., Wan, R., Sato, K., Horton, P. & Frith, M.C. Adaptive seeds tame genomic  
819 sequence comparison. *Genome research* **21**, 487-493 (2011).
- 820 72. Wang, Y. *et al.* MCScanX: a toolkit for detection and evolutionary analysis of gene  
821 synteny and collinearity. *Nucleic acids research* **40**, e49-e49 (2012).

- 822 73. Wang, D., Zhang, Y., Zhang, Z., Zhu, J. & Yu, J. KaKs\_Calculator 2.0: a toolkit  
823 incorporating gamma-series methods and sliding window strategies. *Genomics,*  
824 *proteomics & bioinformatics* **8**, 77-80 (2010).
- 825 74. Bolger, A.M., Lohse, M. & Usadel, B. Trimmomatic: a flexible trimmer for Illumina  
826 sequence data. *Bioinformatics (Oxford, England)* **30**, 2114-2120 (2014).
- 827 75. Andrews, S. FastQC: A Quality Control Tool for High Throughput Sequence Data (2010).
- 828 76. Kim, D., Paggi, J.M., Park, C., Bennett, C. & Salzberg, S.L. Graph-based genome alignment  
829 and genotyping with HISAT2 and HISAT-genotype. *Nature biotechnology* **37**, 907-915  
830 (2019).
- 831 77. Liao, Y., Smyth, G.K. & Shi, W. featureCounts: an efficient general purpose program for  
832 assigning sequence reads to genomic features. *Bioinformatics* **30**, 923-930 (2013).
- 833 78. Team", R.C. R: A language and environment for statistical computing. . (ed. Computing,  
834 R.F.f.S.) (Vienna, Austria, 2020).
- 835 79. Love, M.I., Huber, W. & Anders, S. Moderated estimation of fold change and dispersion  
836 for RNA-seq data with DESeq2. *Genome biology* **15**, 550-550 (2014).
- 837 80. Anders, S. *et al.* Count-based differential expression analysis of RNA sequencing data  
838 using R and Bioconductor. *Nature Protocols* **8**, 1765-1786 (2013).
- 839 81. Young, M.D., Wakefield, M.J., Smyth, G.K. & Oshlack, A. Gene ontology analysis for RNA-  
840 seq: accounting for selection bias. *Genome Biology* **11**, R14 (2010).
- 841 82. Robinson, M.D., McCarthy, D.J. & Smyth, G.K. edgeR: a Bioconductor package for  
842 differential expression analysis of digital gene expression data. *Bioinformatics* **26**, 139-  
843 40 (2010).
- 844 83. Shealy, B.T., Burns, J.J.R., Smith, M.C., Feltus, F.A. & Ficklin, S.P. GPU Implementation of  
845 Pairwise Gaussian Mixture Models for Multi-Modal Gene Co-Expression Networks. *IEEE*  
846 *Access* **7**, 160845-160857 (2019).
- 847 84. Song, L., Langfelder, P. & Horvath, S. Comparison of co-expression measures: mutual  
848 information, correlation, and model based indices. *BMC Bioinformatics* **13**, 328 (2012).
- 849 85. Shannon, P. *et al.* Cytoscape: a software environment for integrated models of  
850 biomolecular interaction networks. *Genome Res* **13**, 2498-504 (2003).
- 851
